# Supplementary material for: Sensory Neuron Expressed TRPC3 Mediates Acute and Chronic Itch
Source: Research Square preprint supplement (doi:10.21203/rs.3.rs-1021582/v1), 2021-11-01
Supplement: Supplementary file 1 [file a85dbc4ede389daa164cc101.docx]

**Table S1. List of DNA primer sequences for quantitative real-time PCR**

| Target gene | | Forward 5’-3’ | Reverse 5’-3’ |
| --- | --- | --- | --- |
| *Trpc3*  *Il-1β*  *Il-6*  *Cxcl10*  *Cxcl1*  *Actb* | GCGAG AAGTGCTGCGAGA  GGAGAACCAAGCAACGACAAAATA  AAAGAG TTGTGCAATGGCAATTCT  TGAATCCGGAATCTAAGACCATCAA  ATCCAGAGCTTGAAGGTGTTG  CTGAATGGCCCAGGTCTGA | | TGCACCACCTCGTACTTATGG  TGGGGAACTCTGCAGACTCAAAC  AAGTGCATCATCGTTGTTCATACA  AGGACTAGCCATCCACTGGGTAAAG  GTCTGTCTTCTTTCTCCGTTACTT  CCCTGGCTGCCTCAACAC |
